# Supplementary material for: VIDAS® TB-IGRA accuracy in tuberculosis patients and persons at varying risk of exposure
Source: bioRxiv or medRxiv preprint supplement (doi:10.1101/2024.07.03.24309158), 2024-07-05
Supplement: Supplementary file [file media-1.pdf]

1 **VIDAS® TB-IGRA accuracy in tuberculosis patients and persons at varying risk of**  
2 **exposure**

3 **Supplementary Information**

4 *Study sites*

5 **Site FR01**

6 Etablissement Français du Sang (EFS), Lyon, Auvergne Rhône-Alpes, France  
7 Yves Mérieux, Francis Camoin, Marie-Christine Lambert, Carine Marliere  
8 Clinical Affairs laboratory, bioMérieux, Marcy l'étoile, France  
9 Laurence Bridon, Pauline Fabre, Aurélie Langlet, Florence Senot, Isabelle Millon

10

11 **Site FR02**

12 Lariboisière Hospital, Paris, France  
13 Dr. Amanda Lopes, Prof Emmanuelle Cambau, Dr Faiza Mougari, Prof Philippe Manivet, Claire Pernin,  
14 Lydia Suarez, Valerie Andrianasolonirina, Véronique Delasse

15

16 **Site FR03**

17 Avicenne Hospital, Paris, France  
18 Dr. Frédéric Méchaï, Fadhila Messani, Miassa Slimani, Ingrid Jacquelin. Laboratory (TB culture): Pr.  
19 Etienne Carbonnelle, Laure Poulet

20

21 **Site FR04**

22 CHU de Saint-Etienne 42055 Saint-Etienne cedex 02  
23 Prof. Elisabeth Botelho-Nevers.  
24 Infectious diseases: Dr Amandine Gagneux-Brunon, Dr Anne Fresard, Veronique Ronat, Philippine  
25 Bourrassaud, Anne Pouvaret. Pneumology: Prof Jean Michel Vergnon, Dr Marios Froudarakis, Rémi  
26 Chapelon. Dermatology: Prof Jean Luc Perrot, Marie Chazelle. Rheumatology: Prof Hubert Marotte,  
27 Hervé Locrelle. Occupational Medicine: Prof Luc Fontana, Marie Christine Coquet. Laboratory: Dr  
28 Claude Lambert, Dr Anne Berger, Alice Haccourt, Alice Chanavat

29

30 **Site FR05**

31 Anti-TB center of Chambéry, Chambéry, France  
32 Dr. Margaux Isnard, Dr Cécile Descotes-Genon, Ms Marie-Christine Carret, Mr Tarik Habet, Dr Marion  
33 Levast, Ms Evelyne Capitan, Corinne Bernati

34

35 **Site FR06**

36 Lapeyronie Hospital, Montpellier, France  
37 Dr. Edouard Tuailon.  
38 Infectious diseases: Quam Edem Aquereburu. Rheumatology: Prof Jacques Morel, Beatrice Tinland,  
39 Sylvie Gouilloux. Occupational Medicine: Dr François-Xavier Lesage, Dr Guillaume Choron, Xavier  
40 Loche. Laboratory: Dr Amandine Pisoni, Brigitte Burrut, Françoise Bel.

41

42 **Site FR07**

43 Anti-TB center of Nanterre, Nanterre, France  
44 Dr. Amel Medjahed-Artebasse

45

- 46 **Bacteriology laboratory, Antoine Bèclère Hospital (APHP), Clamart, France**  
47 *Testing of samples from sites FR03 and FR07*  
48 Pr Doucet- Populaire Florence, Dr Christelle Guillet-Caruba, Rachida Aït El Far, Sandrine Roze, Daniel  
49 Martinho  
50  
51 **Site GB01**  
52 St Thomas' Hospital, London, UK  
53 Dr. Ronan Breen, Arbane Gill, Laletha Agoramoorthy  
54  
55 **Site GB02**  
56 Evelina London Children's Hospital, London, UK  
57 Dr. Julia Kenny, Dr Marc Tebruegge, Bethany Hamilton, Christian Henderson, Daniella Hydes  
58  
59 **CIDR Laboratory (Centre for Clinical Infection & Diagnostics Research)**  
60 *VIDAS testing for sites GB01 and GB02*  
61 Dr. Rahul Batra, Amita Patel, Bindi Patel  
62  
63 **Site IT01**  
64 INMI L. Spallanzani, Rome, Italy  
65 Dr. Delia Goletti, Dr Elisa Petruccioli, Dr Gina Gualano, Valentina Vanini, Gilda Cuzzi  
66  
67 **Site ME01**  
68 Autonomous University of Baja California, Mexicali, Mexico  
69 Dr. Julia Dolores Estrada Guzman, Dr Rosa Herrera-Torres, Dr Zuceth Duran-Gomez, Dr Fernanda  
70 Cervantes-Lopez, Dr Rene Machado-Contreras, Salvador Josaet Cervantes-Borrego, Yosef Dueñez-  
71 Uriarte  
72  
73 **Site US01**  
74 Rutgers University, Newark, NJ (USA)  
75 Dr. Maria Laura Gennaro, Dr Alfred Lardizabal, Deborah Handler, Dr. Natalie Bruiners, Dr. Rahul Ukey,  
76 Blas Peixoto, Alberta Onyuka, Ariana Alcaide  
77  
78 **Collaborating hospitals with US01**  
79 Doreen Dutchak RN, and Christian Engell, MD, Newark Beth Israel Medical Center  
80 Mabel La Forgia, RN, and Joseph DePasquale, MD, Jersey City Medical Center  
81  
82 **Site US02**  
83 University of California San Diego, San Diego, CA (USA)  
84 Dr. David T. Pride, Nathan Kendrick, Steven Hendrickx, Stephanie Solso, Helene Le, Joseph Lencioni,  
85 Rueben Barba, Maria Pizzaro, Jenny Shin  
86  
87 **Site US04**  
88 Stanford University, Palo Alto, CA (USA)  
89 Dr. Niaz Banaei, Arena Shafeque, Fiona Senchyna  
90  
91 **Site US05**  
92 Saint Louis University, St Louis, MO (USA)  
93 Dr. Daniel Hoft, Dr. Azra Blazevic, Linda Eggemeyer-Sharpe, Janice Tennant, Sabrina Dipiazza, Kate  
94 Lierfer, Joan Siegner, Amanda Nethington, Tammy Blevins, Yinyi Yu, Huan Ning  
95

96 **Site US06**

97 National Jewish Health, Denver, CO (USA)

98 Dr. Charles Daley, Dr Robert Belknap, Dr Michael Wilson, Michael Higgins, Kaylynn Aiona

99

100 **Site US07**

101 University of Illinois, Chicago, IL (USA)

102 Dr Nahed Ismail, Dr Susan Bleasdale, Anh Nguyen, Iuliana Bentea, Brenna Lindsey

103

104 **Site ZA01**

105 University of Cape Town, Cape Town, South Africa

106 Prof. Keertan Dheda, Dr Aliasgar Esmail, Dr Suzette Oelofse, Dr Lynelle Mottay, Marietjie Pretorius,

107 Richard Meldau, Carley Mandviwala, Maria Gorgel, Eleanor Pretorius, Solomri Foloti, Lusanda Yenani,

108 Vonnita Loren, Wasiela Galant

109

110 **Site ZA02**

111 TASK Applied Science, Cape Town, South Africa

112 Dr Naadira Vanker, Dr Caryn Upton, Michelle Eriksson, Martha Jacobs, Anastacia Arendse, Wendy

113 Wakens, Dorothy Zakariya, Alexandra Waltman, Chantell Meyer, Margaret Muller, Michele van Rooyen,

114 Phumza Setlaba, Patricia Maunder, Mlungisi Mnuu, Doreen Petersen, Charné Rossouw, Magdalene

115 Kennedy, Silvia Nunes, Thirumani Govender, Lize Greyling, Jacqueline Russouw, Katriena Ross, Tracy

116 Jack, Kurt McQuire, Diane Lavies, Beulah Classen, Carmen Kleinhans, Julia Sims, Bryan Esterhuizen,

117 Sven Friedrich, Cebisa Mdladla, Bongiwwe Gwadela, Fay Swanson, Pascal Musoni, Dustin Bosch, Lucille

118 October, Atica Moosa, Karabo Mahlangu, Olwethu Ngxisho, Chaldene Johannes, Chantal Botha, Alta

119 Mwela, Leylani Croy

120

121

122 *Supplementary Methods*

123 Sensitivity of QFT-Plus and VIDAS® TB-IGRA were independently calculated, as follows:

124 
$$\text{Sensitivity} = 100 * \frac{TP}{TP + FN}$$

125 where TP = true positives (*i.e.*, culture-confirmed TB disease and positive test result) and

126 FN = false negatives (*i.e.*, culture-confirmed TB disease and negative test result).

127

128 To evaluate the VIDAS® TB-IGRA accuracy for the mixed exposure risk population, positive

129 percent agreement (PPA) and negative percent agreement (NPA) relative to the QFT-Plus were

130 calculated as follows, along with the 95% confidence interval (95%CI).

131 
$$\text{PPA} = 100 * \frac{a}{a + c} \quad \text{and} \quad \text{NPA} = 100 * \frac{d}{d + b}$$

132 where a, b, c, and d are defined as follows:

|                          |          | QFT-Plus result |          | Total   |
|--------------------------|----------|-----------------|----------|---------|
|                          |          | Positive        | Negative |         |
| VIDAS®<br>TB-IGRA result | Positive | a               | b        | a+b     |
|                          | Negative | c               | d        | c+d     |
| Total                    |          | a+c             | b+d      | a+b+c+d |

133

134

135 *Supplementary Tables and Figures*136 **Supplementary Table S1.** Study sites for the TB disease and mixed exposure risk populations.

| Region | Country | Site Code | Site name / City                                         | Principal Investigator                        | Site responsibilities                     | TB disease Patients<br>(n = 200) | Mixed exposure risk Participants<br>(n = 1460) |
|--------|---------|-----------|----------------------------------------------------------|-----------------------------------------------|-------------------------------------------|----------------------------------|------------------------------------------------|
| EU     | France  | FR01*     | Clinical Affairs Laboratory, bioMérieux / Marcy l'Etoile | Laurence Bridon                               | VIDAS testing                             | –                                | 125                                            |
| EU     | France  | FR02      | Lariboisière Hospital / Paris                            | Dr. Amanda Lopes                              | Recruitment, Testing (QFT-Plus and VIDAS) | 5                                | –                                              |
| EU     | France  | FR03**    | Avicenne Hospital / Paris                                | Dr. Frederic Méchaï                           | Recruitment                               | 3                                | 2                                              |
| EU     | France  | FR04      | North Hospital / St. Etienne                             | Prof. Elisabeth Botelho-Nevers                | Recruitment, Testing (QFT-Plus and VIDAS) | 4                                | 91                                             |
| EU     | France  | FR05      | Anti-TB center of Chambéry                               | Dr. Margaux Isnard                            | Recruitment, Testing (QFT-Plus and VIDAS) | 5                                | 45                                             |
| EU     | France  | FR06      | Lapeyronie Hospital / Montpellier                        | Dr. Edouard Tuaillon                          | Recruitment, Testing (QFT-Plus and VIDAS) | –                                | 86                                             |
| EU     | France  | FR07**    | Anti-TB center of Nanterre                               | Dr. Amel Medjahed                             | Recruitment                               | –                                | 127                                            |
| EU     | UK      | GB01***   | St Thomas' Hospital / London                             | Dr. Ronan Breen                               | Recruitment                               | 1                                | 11                                             |
| EU     | UK      | GB02****  | Evelina London Children's Hospital                       | Dr. Marc Tebruegge replaced by Dr Julia Kenny | Recruitment                               | –                                | 3                                              |
| EU     | Italy   | IT01      | INMI L. Spallanzani-IRCCS / Rome                         | Dr. Delia Goletti                             | Recruitment, Testing (QFT-Plus and VIDAS) | 5                                | 28                                             |
| US     | USA     | US01      | Rutgers University / Newark                              | Dr. Maria Laura Gennaro                       | Recruitment, Testing (QFT-Plus and VIDAS) | 17                               | 77                                             |
| US     | USA     | US02      | University of California / San Diego                     | Dr. David T. Pride                            | Recruitment, Testing (QFT-Plus and VIDAS) | –                                | 5                                              |
| US     | USA     | US04      | Stanford University / Palo Alto                          | Dr. Niaz Banaei                               | Recruitment, Testing (QFT-Plus and VIDAS) | –                                | 144                                            |
| US     | USA     | US05      | Saint Louis University                                   | Dr. Daniel Hoft                               | Recruitment, Testing (QFT-Plus and VIDAS) | –                                | 207                                            |
| US     | USA     | US06      | National Jewish Health / Denver                          | Dr. Charles Daley                             | Recruitment, Testing (QFT-Plus and VIDAS) | –                                | 100                                            |

|     |              |      |                                                     |                                  |                                           |     |     |
|-----|--------------|------|-----------------------------------------------------|----------------------------------|-------------------------------------------|-----|-----|
| US  | USA          | US07 | University of Illinois / Chicago                    | Dr Nahed Ismail                  | Recruitment, Testing (QFT-Plus and VIDAS) | –   | 179 |
| ROW | Mexico       | ME01 | Autonomous University of Baja California / Mexicali | Dr. Julia Dolores Estrada Guzman | Recruitment, Testing (QFT-Plus and VIDAS) | 3   | 77  |
| ROW | South Africa | ZA01 | University of Cape Town                             | Prof. Keertan Dheda              | Recruitment, Testing (QFT-Plus and VIDAS) | 105 | 74  |
| ROW | South Africa | ZA02 | TASK Applied Science / Cape Town                    | Dr. Naadira Vanker               | Recruitment, Testing (QFT-Plus and VIDAS) | 52  | 79  |

137

\* For the additional responsibilities:

138

- Recruitment was performed by the national French organization for blood donation (EFS) Auvergne Rhône-Alpes

139

- QFT®-Plus testing was performed by St Etienne Hospital (site FR04 laboratory)

140

\*\* Testing (QFT-Plus and VIDAS) was performed by Antoine Béclère Hospital (APHP), Bacteriology laboratory, Clamart, France

141

\*\*\* For the additional responsibilities:

142

- QFT-Plus testing was performed by TDL Trials - The Doctors Laboratory

143

- VIDAS testing was performed by CIDR (Centre for Clinical Infection &amp; Diagnostics Research) Guy's and St Thomas' NHS Foundation Trust, London

144

**Abbreviations:** EU, European Union; ROW, Rest of the World; US, United States.

145

146 **Supplementary Table S2.** Criteria for stratification of the mixed exposure risk population based  
 147 on TB-exposure risk level.

| TB-exposure risk        |                | Criteria                                                                                                                    | Number of individuals (%) |             |
|-------------------------|----------------|-----------------------------------------------------------------------------------------------------------------------------|---------------------------|-------------|
| <b>Aggregate Low</b>    | Extremely Low  | Blood donors from low burden countries, without known TB-exposure risk factors                                              | 125 (8.6%)                | 333 (22.8%) |
|                         | Very Low       | Persons without known TB-exposure risk who were screened for TB infection prior to or during immunosuppressive therapy      | 90 (6.2%)                 |             |
|                         | Low            | Medical students in low TB-burden countries without known TB-exposure risk factors                                          | 118 (8.1%)                |             |
| <b>Aggregate Medium</b> | Medium Low     | Healthcare workers or volunteers without known TB-exposure risk factors                                                     | 598 (41.0%)               | 679 (46.5%) |
|                         | Medium         | Persons from TB-related settings in low TB-burden countries                                                                 | 13 (0.9%)                 |             |
|                         | Medium High    | Immigrants or residents of countries with high TB incidence<br>Persons who spent >1 month in an area with high TB incidence | 68 (4.7%)                 |             |
| <b>Aggregate High</b>   | High           | TB-case contacts (non-household)                                                                                            | 296 (20.3%)               | 447 (30.6%) |
|                         | Very High      | TB-case contacts (same house)                                                                                               | 81 (5.6%)                 |             |
|                         | Extremely High | TB-case contacts (same bedroom)                                                                                             | 70 (4.8%)                 |             |

148  
 149

150 **Supplementary Table S3.** Institutional Review board (IRB) or Independent Ethics Committee  
 151 (IEC) approval codes for each study operating site. All sites complied with the Declaration of  
 152 Helsinki, the International Council for Harmonisation of Technical Requirements for  
 153 Pharmaceuticals for Human Use (ICH) Good Clinical Practice (GCP) guidelines as applicable to  
 154 *in vitro* diagnostic (IVD) studies, and the laws and regulations of their respective countries. The  
 155 Principal Investigator of each site was responsible for ensuring compliance with these regulations  
 156 and adherence to approved protocols, and written informed consent was obtained from all study  
 157 participants.

| Site Code                                    | Country      | IRB/IEC Code                                                                                                                                                                                   |
|----------------------------------------------|--------------|------------------------------------------------------------------------------------------------------------------------------------------------------------------------------------------------|
| FR01                                         | France       | N/A (French Blood Bank)                                                                                                                                                                        |
| FR02<br>FR03<br>FR04<br>FR05<br>FR06<br>FR07 | France       | 2019-A00998-49                                                                                                                                                                                 |
| GB01<br>GB02                                 | UK           | CTPR01<br>IRAS: 265866; REC: 19/WA/0284<br>CTPR02<br>IRAS: 266217; REC: 19/WA/0285<br>REC: Wales REC 7                                                                                         |
| IT01                                         | Italy        | INMI "L. Spallanzani" Ethics Committee approval n°35/2019                                                                                                                                      |
| ME01                                         | Mexico       | 02-01-HGMXL/FMED-UABC-2019-08-29-254                                                                                                                                                           |
| US01                                         | USA          | CTPR01: Pro2019001840; CTPR02: Pro2019001936                                                                                                                                                   |
| US02<br>US05<br>US06                         | USA          | WIRB Tracking Number<br>CTPR01: 20191965; CTPR02: 20192037; CTPR03: 20192039                                                                                                                   |
| US04                                         | USA          | eProtocol#: 53485                                                                                                                                                                              |
| US07                                         | USA          | 2019-1145                                                                                                                                                                                      |
| ZA02                                         | South Africa | Pharma ethics<br>CTPR01: 190822774; CTPR02: 190822777<br>SAHPRA<br>CTPR01: MD20190803; CTPR02: MD20190804<br>University of Cape Town Human Research Ethics Committee<br>CTPR01 and 2: 840/2019 |

158 **Abbreviations:** IRAS, Integrated Research Application System; SAHPRA, South African Health  
 159 Products Regulatory Authority; REC, Research Ethics Committee; WIRB, Western Institutional Review  
 160 Board.



161 **Supplementary Table S4.** Cut-off values and result interpretation for the VIDAS® TB-IGRA  
 162 assay.

| NIL (IU/ml) | AG-NIL (IU/ml)                          | MIT-NIL (IU/ml) | Interpretation            | Clinical Significance                                     |
|-------------|-----------------------------------------|-----------------|---------------------------|-----------------------------------------------------------|
| < 6.40      | ≥ 0.35 and ≥25% NIL                     | Any             | Positive                  | <i>M. tb</i> infection likely                             |
|             | < 0.35<br>or<br>≥ 0.35 and < 25%<br>NIL | ≥ 1.1           | Negative                  | <i>M. tb</i> infection not likely                         |
|             |                                         | < 1.1           | INDETERMINATE<br>MIT Low  | Likelihood of <i>M. tb</i> infection cannot be determined |
| ≥ 6.40      | Any                                     |                 | INDETERMINATE<br>NIL High | Likelihood of <i>M. tb</i> infection cannot be determined |

163 **Abbreviations:** AG, antigen; MIT, mitogen (positive control); NIL, negative control.

164

165 **Supplementary Table S5.** Negative percent agreement (NPA) and positive percent agreement  
 166 (PPA) for the VIDAS® TB-IGRA relative to the QFT-Plus test for individuals in the mixed  
 167 exposure risk population at nine levels of risk for TB, ranging from extremely low to extremely  
 168 high. NPA and PPA were also calculated for the three main levels of TB exposure: aggregate low,  
 169 medium, and high.

| TB-Exposure Risk        | QFT-Plus Negative results (n=1217) |                |      |                        | QFT-Plus Positive results (n=242) |                |      |                          |
|-------------------------|------------------------------------|----------------|------|------------------------|-----------------------------------|----------------|------|--------------------------|
|                         | n                                  | VIDAS® TB-IGRA |      | NPA<br>[95% CI]        | n                                 | VIDAS® TB-IGRA |      | PPA<br>[95% CI]          |
|                         |                                    | Neg.           | Pos. |                        |                                   | Pos.           | Neg. |                          |
| Extremely Low           | 119                                | 119            | 0    | 100%<br>[96.9, 100.0]% | 6                                 | 3              | 3    | 50.0%<br>[18.8, 81.2]%   |
| Very Low                | 84                                 | 78             | 6    | 92.9%<br>[85.3, 96.7]% | 6                                 | 4              | 2    | 66.7%<br>[30.0, 90.3]%   |
| Low                     | 117                                | 113            | 4    | 96.6%<br>[91.5, 99.1]% | 1                                 | 1              | 0    | 100.0%<br>[2.5, 100.0]%  |
| <b>Aggregate Low</b>    | 320                                | 310            | 10   | 96.9%<br>[94.3, 98.5]% | 13                                | 8              | 5    | 61.5%<br>[35.5, 82.3]%   |
| Medium Low              | 593                                | 550            | 43   | 92.7%<br>[90.4, 94.6]% | 5                                 | 2              | 3    | 40.0%<br>[11.8, 76.9]%   |
| Medium                  | 13                                 | 12             | 1    | 92.3%<br>[66.7, 98.6]% | 0                                 | N/A            | N/A  | N/A                      |
| Medium High             | 31                                 | 25             | 6    | 80.6%<br>[63.7, 90.8]% | 37                                | 34             | 3    | 91.9%<br>[78.7, 97.2]%   |
| <b>Aggregate Medium</b> | 637                                | 587            | 50   | 92.2%<br>[89.8, 94.0]% | 42                                | 36             | 6    | 85.7%<br>[72.2, 93.3]%   |
| High                    | 184                                | 144            | 40   | 78.3%<br>[71.8, 83.6]% | 112                               | 104            | 8    | 92.9%<br>[86.5, 96.3]%   |
| Very High               | 45                                 | 36             | 9    | 80.0%<br>[66.2, 89.1]% | 36                                | 36             | 0    | 100.0%<br>[90.3, 100.0]% |
| Extremely High          | 31                                 | 20             | 11   | 64.5%<br>[46.9, 78.9]% | 39                                | 39             | 0    | 100.0%<br>[91.0, 100.0]% |
| <b>Aggregate High</b>   | 260                                | 200            | 60   | 76.9%<br>[71.4, 81.6]% | 187                               | 179            | 8    | 95.7%<br>[91.7, 98.1]%   |

170 **Abbreviations:** CI, confidence interval; QFT-Plus, QuantiFERON Plus.

171

172

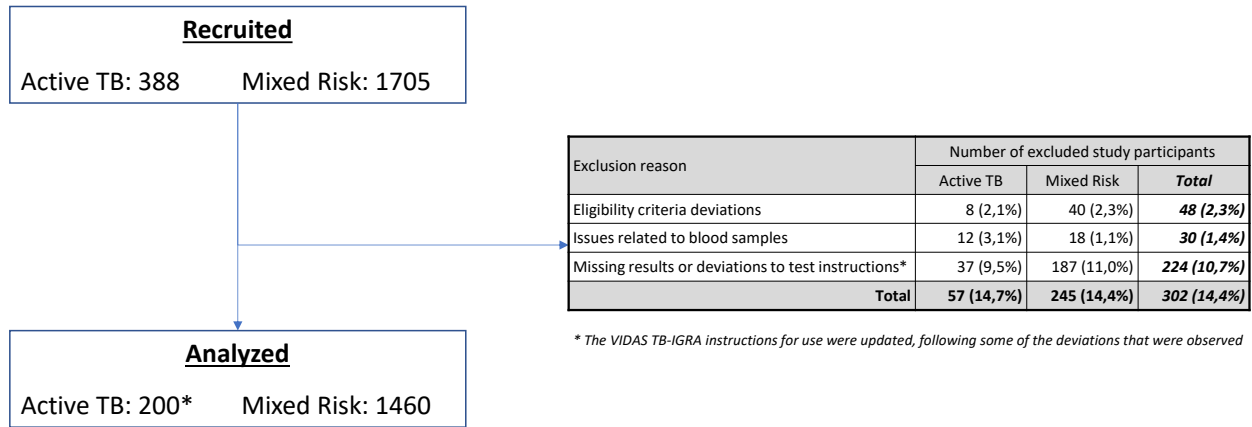

\* patients not included in sensitivity computations:  
 • 76 patients with negative TB-culture  
 • 55 patients with positive TB-culture due to sequential design

173  
174  
175  
176

**Supplementary Figure S1.** Flow of participants through the study.

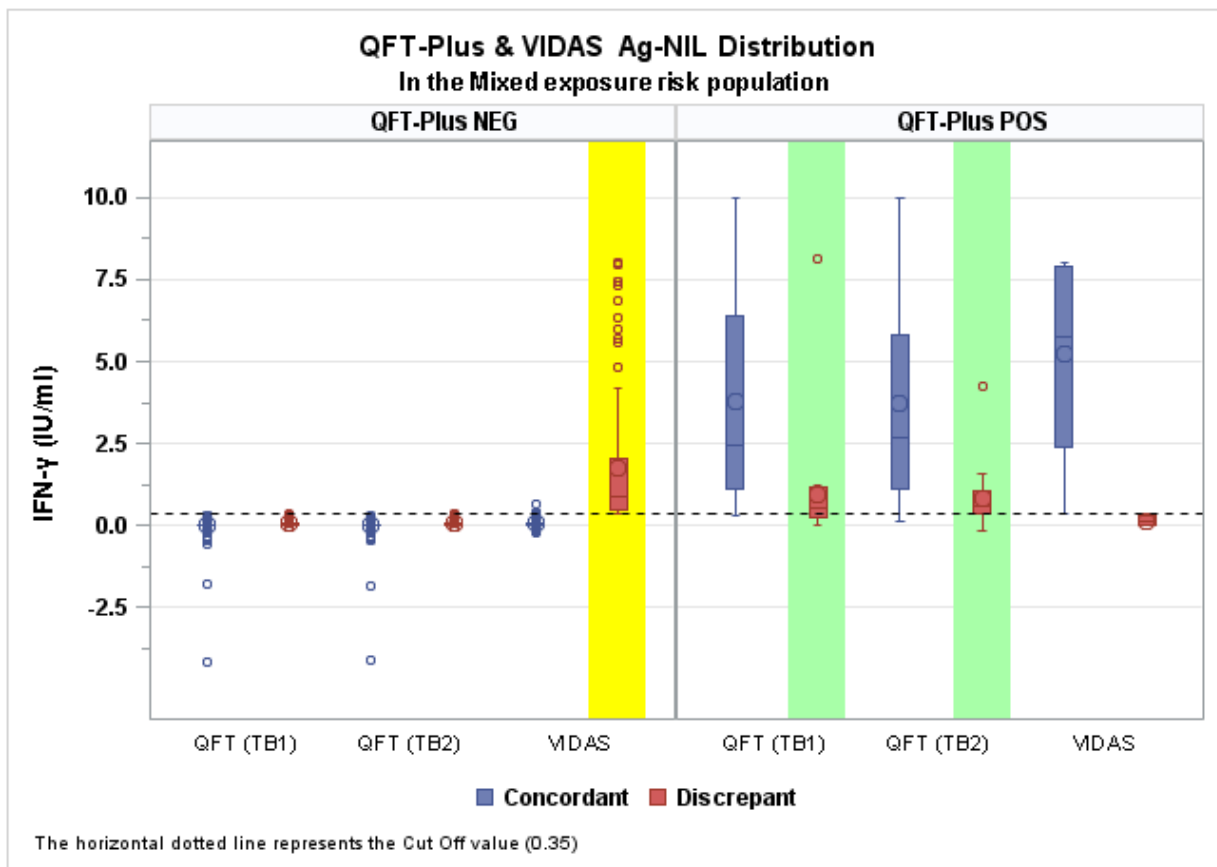

177

178

179

180

**Supplementary Figure S2.** Distribution of interferon (IFN)- $\gamma$  concentrations measured by the QFT-Plus and VIDAS® TB-IGRA in the mixed exposure risk population. The dashed line, at 0.35 IU/mL, represents the cut-off that is used for result interpretation. For the VIDAS® TB-

181 IGRA, the cut-off applies to antigen (AG)-negative control (NIL) value. For the QFT-Plus, the  
 182 cut-off applies to TB1-NIL and TB2-NIL values. See supplementary table S4 for more details  
 183 about the VIDAS® TB-IGRA interpretation algorithm. Values from concordant results were  
 184 spread across the measuring interval for both tests, as follows: i) from 0 to 0.35 IU/mL for  
 185 concordant negative results (blue boxes on left side of the graph) and ii) from 0.35 IU/mL to the  
 186 end of the respective measuring interval of each assay, for concordant positive results (blue  
 187 boxes on right side of the graph). For discrepant results with QFT®-Plus positive (red boxes in  
 188 green bands), TB1-NIL and TB2-NIL values were grouped more tightly near the cut-off relative  
 189 to the positive concordant results. In contrast, when the VIDAS® TB-IGRA was positive (red  
 190 box in yellow band), AG-NIL values covered a large portion of the measuring interval, with  
 191 several points in the higher half. This suggests that at least a portion of discrepant results were  
 192 associated with IFN- $\gamma$  concentrations far from the cut-off, especially when the VIDAS® TB-  
 193 IGRA was positive.

194

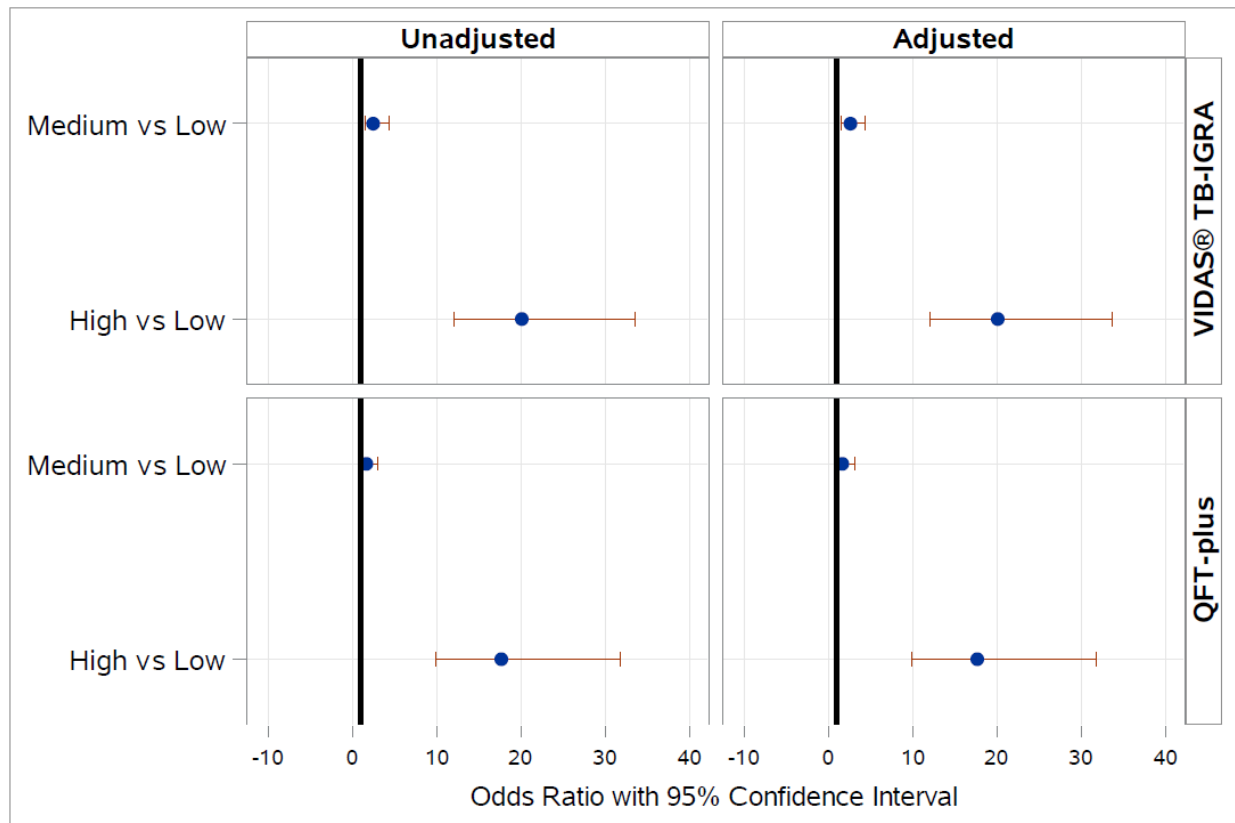

195

196

197

198

**Supplementary Figure S3.** Univariate and multivariate odds ratios determined by logistic regression for aggregate TB exposure risk groups.

199

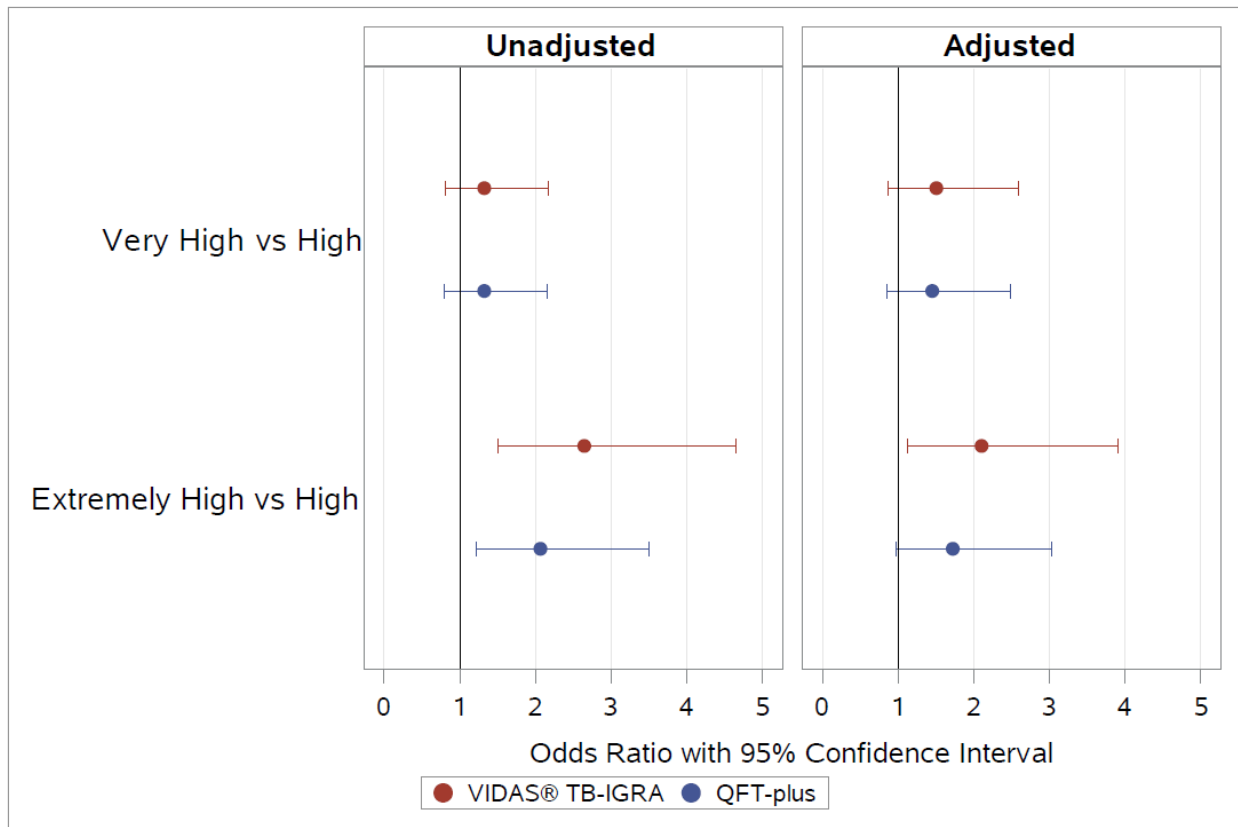

200 **Supplementary Figure S4.** Univariate and multivariate odds ratios determined by logistic  
 201 regression for the three subgroups in the aggregate-high TB exposure risk group.  
 202  
 203  
 204  
 205  
 206
